# Supplementary material for: A novel chitosan–PEG hydrogel embedded with in situ silver nanoparticles of Clerodendrum glandulosum Lindl. extract: evaluation of its in vivo diabetic wound healing properties using an image-guided machine learning model
Source: Royal Society of Chemistry journal article supplement (doi:10.1039/d4bm00349g), 2024-01-01
Supplement: d4bm00349g1.pdf [file d4bm00349g1.pdf]

**A novel chitosan-PEG hydrogel embedded with *in situ* silver nanoparticles of *Clerodendrum glandulosum* Lindl. extract: Evaluation of its *in vivo* diabetic wound healing property using an image-guided machine learning model**

Ankit Majie<sup>1#</sup>, Rajdeep Saha<sup>1#</sup>, Arnab Sarkar<sup>2§</sup>, Rudranil Bhowmik<sup>2§</sup>, Sanmoy Karmakar<sup>2§</sup>, Vishal Sharma<sup>3</sup>, Kaushal Deokar<sup>3</sup>, Asad ul Haque<sup>3</sup>, Sanjaya Shankar Tripathy<sup>3</sup>, and Biswatrish Sarkar<sup>1,\*</sup>

<sup>1</sup> Group Polyphenol-BIT, Department of Pharmaceutical Sciences and Technology, Birla Institute of Technology, Mesra, Ranchi (India) 835215.

<sup>2</sup> Bioequivalence Study Centre, Department of Pharmaceutical Technology, Jadavpur University, Kolkata, India.

<sup>3</sup> Department of Electronics and Communication Engineering, Birla Institute of Technology, Mesra, Ranchi (India) 835215.

**\*Corresponding author**

Dr. Biswatrish Sarkar  
Assistant Professor  
Department of Pharmaceutical Sciences and Technology,  
Birla Institute of Technology, Mesra, Ranchi 835215, India.  
**Email address:** [biswatrishsarkar@bitmesra.ac.in](mailto:biswatrishsarkar@bitmesra.ac.in)  
**Tel:** +91 99559 14893

**#Both authors have contributed equally to this manuscript.**

**§These authors have contributed equally to this manuscript.**

***Email addresses:***

[majie99ankit@gmail.com](mailto:majie99ankit@gmail.com) (A. Majie)

[rajboy277773@gmail.com](mailto:rajboy277773@gmail.com) (R. Saha)

[sarkar.arnab54@yahoo.com](mailto:sarkar.arnab54@yahoo.com) (A. Sarkar)

[rudranilz@yahoo.com](mailto:rudranilz@yahoo.com) (R. Bhowmik)

[sanmoy.karmakar@jadavpuruniversity.in/](mailto:sanmoy.karmakar@jadavpuruniversity.in/) [sanmoykarmakar@gmail.com](mailto:sanmoykarmakar@gmail.com) (S. Karmakar)

[btech10091.20@bitmesra.ac.in](mailto:btech10091.20@bitmesra.ac.in) (V. Sharma)

[btech10089.20@bitmesra.ac.in](mailto:btech10089.20@bitmesra.ac.in) (K. Deokar)

[btech10214.20@bitmesra.ac.in](mailto:btech10214.20@bitmesra.ac.in) (A. Haque)

[sstripathy@bitmesra.ac.in](mailto:sstripathy@bitmesra.ac.in) (S.S. Tripathy)

[biswatrishsarkar@bitmesra.ac.in](mailto:biswatrishsarkar@bitmesra.ac.in) (B. Sarkar)

## Supplementary file

The code for studying the wound area in the different treatment groups is mentioned below.

```
import cv2
import numpy as np

def sd():

    # Image dimensions
    image_width = 131 # pixels
    image_height = 266 # pixels

    # List of file paths
    image_paths = [
        r"D:\proj\image processing\Animal study pics _ CSE
dept\standard day\Standard _ Day 1.jpg",
        r"D:\proj\image processing\Animal study pics _ CSE
dept\standard day\Standard _ Day 3.jpg",
        r"D:\proj\image processing\Animal study pics _ CSE
dept\standard day\Standard _ Day 5.jpg",
        r"D:\proj\image processing\Animal study pics _ CSE
dept\standard day\Standard _ Day 7.jpg",
        r"D:\proj\image processing\Animal study pics _ CSE
dept\standard day\Standard _ Day 9.jpg",
        r"D:\proj\image processing\Animal study pics _ CSE
dept\standard day\Standard _ Day 11.jpg",
        r"D:\proj\image processing\Animal study pics _ CSE
dept\standard day\Standard _ Day 13.jpg"
    ]

    # Initialize an empty list to store wound areas
    wound_areas = []

    # Initialize a list to store resized images
    resized_images = []

    for image_path in image_paths:
        # Read the image from file
        frame = cv2.imread(image_path)

        # Resize the image to a common height
        ratio = image_height / frame.shape[0]
        resized_frame = cv2.resize(frame, (int(frame.shape[1] * ratio),
image_height))

        # Append the resized image to the list
        resized_images.append(resized_frame)

        # Convert BGR to HSV color scheme
        hsv = cv2.cvtColor(frame, cv2.COLOR_BGR2HSV)

        # Define a narrow range of wound colors in HSV (shades of red)
        lower_red = np.array([175, 120, 105])
        upper_red = np.array([190, 255, 255])
```

```

mask = cv2.inRange(hsv, lower_red, upper_red)

lower_red = np.array([0, 100, 100])
upper_red = np.array([10, 255, 255])

# Threshold the HSV image to get only wound colors
mask = mask + cv2.inRange(hsv, lower_red, upper_red)

square_mask = np.zeros((image_height, image_width),
dtype=np.uint8)
cv2.rectangle(square_mask, (0, 80), (image_width, image_height-
80), 255, -1)

mask = mask & square_mask

# Apply Gaussian blur to the mask for better contour detection
blurred_mask = cv2.GaussianBlur(mask, (5, 5), 0)

# Calculating percentage area
try:
    contours, hierarchy = cv2.findContours(blurred_mask,
cv2.RETR_TREE, cv2.CHAIN_APPROX_SIMPLE)
    cnt = max(contours, key=lambda x: cv2.contourArea(x))

    epsilon = 0.0005 * cv2.arcLength(cnt, True)
    approx = cv2.approxPolyDP(cnt, epsilon, True)

    areacnt = cv2.contourArea(cnt)
    arearatio = (areacnt / (image_width * image_height)) * 100

    boxes = []
    for c in cnt:
        (x, y, w, h) = cv2.boundingRect(c)
        boxes.append([x, y, x + w, y + h])

    boxes = np.asarray(boxes)
    # need an extra "min/max" for contours outside the frame
    left = np.min(boxes[:, 0])
    top = np.min(boxes[:, 1])
    right = np.max(boxes[:, 2])
    bottom = np.max(boxes[:, 3])

    cv2.rectangle(resized_frame, (left, top), (right, bottom),
(255, 0, 0), 2)

    # Append the wound area to the list
    wound_areas.append(arearatio * 0.6615)

except Exception as e:
    # Handle exceptions, if any
    print(f"Error processing image: {e}")
    wound_areas.append(None)

# Print the list of wound areas
for i, area in enumerate(wound_areas):
    print(f"Image {i + 1} - Wound Area: {area} cm squared")

```

```

# Display the resized images with the detected wounds
cv2.imshow('Detected Wounds (Standard Day)',
np.hstack(resized_images))
cv2.waitKey(0)
cv2.destroyAllWindows()

return wound_areas

```

**Table S1.** The functional groups with their corresponding wavenumbers that are present in CG plant extract, CGH, and BH (results are shown as mean  $\pm$  s.d., where n=3).

| CG plant extract               |                                                          | CGH                            |                                                          | BH                             |                               |
|--------------------------------|----------------------------------------------------------|--------------------------------|----------------------------------------------------------|--------------------------------|-------------------------------|
| Wavenumber (cm <sup>-1</sup> ) | Functional group                                         | Wavenumber (cm <sup>-1</sup> ) | Functional group                                         | Wavenumber (cm <sup>-1</sup> ) | Functional group              |
| 816                            | C=C bending of alkene                                    | 840                            | C=C bending of alkene                                    | 668                            | C-Br stretching of the alkene |
| 1035                           | CO-O-CO stretching of anhydride                          | 1049                           | CO-O-CO stretching of anhydride                          | 1215                           | C-O stretching                |
| 1361                           | S=O stretching of sulphonamide                           | 1341                           | S=O stretching of sulphonamide                           | 1375                           | O-H bending of phenol         |
| 1695                           | C=C stretching of conjugated alkene                      | 1634                           | C=C stretching of conjugated alkene                      | 1845                           | C=O stretching of anhydride   |
| 2923                           | C-H stretching of alkane                                 | 2884                           | C-H stretching of alkane                                 | 2350                           | O=C=O stretching              |
| 3252                           | O-H stretching of alcohol which is intermolecular bonded | 3399                           | O-H stretching of alcohol which is intermolecular bonded | 2971                           | C-H stretching of alkane      |

**Abbreviations:** CG – *Cleordendrum glandulosum*; BH – Blank hydrogel; CGH – CG-AgNPs loaded hydrogel

**Table S2.** The percentage of radical scavenging activity with increasing concentrations of BH and CGH formulations and the standard against DPPH and ABTS free radicals (results are shown as mean  $\pm$  s.d., where n=3).

| Concentration ( $\mu$ g/ml) | Percentage of radical scavenging activity |                  |                          | Abbreviations:                                              |
|-----------------------------|-------------------------------------------|------------------|--------------------------|-------------------------------------------------------------|
|                             | DPPH assay                                |                  |                          |                                                             |
|                             | BH                                        | CGH              | Standard (ascorbic acid) |                                                             |
| 50                          | 0.79 $\pm$ 0.55                           | 1.59 $\pm$ 1.18  | 9.73 $\pm$ 5.35          | BH – Blank hydrogel; CGH – CG-AgNPs loaded hydrogel; DPPH – |
| 100                         | 7.39 $\pm$ 5.35                           | 15.83 $\pm$ 3.87 | 27.57 $\pm$ 6.00         |                                                             |
| 200                         | 20.44 $\pm$ 5.11                          | 25.58 $\pm$ 4.02 | 40.53 $\pm$ 5.53         |                                                             |
| 400                         | 38.31 $\pm$ 5.51                          | 59.34 $\pm$ 5.94 | 63.06 $\pm$ 3.31         |                                                             |
| 800                         | 74.21 $\pm$ 5.05                          | 96.63 $\pm$ 2.89 | 98.13 $\pm$ 1.71         |                                                             |
|                             | ABTS assay                                |                  |                          |                                                             |
| 50                          | 0.99 $\pm$ 0.81                           | 1.26 $\pm$ 0.94  | 8.65 $\pm$ 6.93          | DPPH –                                                      |
| 100                         | 6.50 $\pm$ 3.76                           | 21.79 $\pm$ 6.37 | 24.66 $\pm$ 5.16         |                                                             |
| 200                         | 24.28 $\pm$ 4.89                          | 37.28 $\pm$ 6.65 | 37.31 $\pm$ 5.91         |                                                             |
| 400                         | 40.92 $\pm$ 6.56                          | 56.02 $\pm$ 5.46 | 52.59 $\pm$ 6.92         |                                                             |
| 800                         | 75.91 $\pm$ 5.49                          | 94.33 $\pm$ 5.01 | 97.08 $\pm$ 2.65         |                                                             |

2,2-diphenyl-1-picrylhydrazyl; ABTS – 2,2'-azino-bis(3-ethylbenzothiazoline-6-sulfonic acid

**Table S3.** Percentage of wound areas of different treatment groups with respect to the number of days as evaluated by the developed machine learning model using the provided datasets of wound images (results are shown as

| Treatment groups | Percentage wound area |                     |                     |                     |                     |                      |                      |                      |
|------------------|-----------------------|---------------------|---------------------|---------------------|---------------------|----------------------|----------------------|----------------------|
|                  | 1 <sup>st</sup> day   | 3 <sup>rd</sup> day | 5 <sup>th</sup> day | 7 <sup>th</sup> day | 9 <sup>th</sup> day | 11 <sup>th</sup> day | 13 <sup>th</sup> day | 15 <sup>th</sup> day |
| BH               | 100 ± 0.00            | 75.9 ± 1.76         | 74.5 ± 1.87         | 55.4 ± 2.85         | 49.7 ± 2.40         | 48.6 ± 1.50          | 39.3 ± 3.05          | 17.4 ± 2.01          |
| CGH              | 100 ± 0.00            | 98.9 ± 1.19         | 97.8 ± 1.40         | 83.4 ± 2.36         | 66.3 ± 2.80         | 55.5 ± 1.92          | 19.4 ± 2.20          | 2.5 ± 1.11           |
| Standard         | 100 ± 0.00            | 97.2 ± 1.55         | 94.2 ± 1.65         | 73.3 ± 1.85         | 63.5 ± 1.46         | 42.4 ± 1.56          | 31.9 ± 1.64          | 6.6 ± 1.41           |

mean ± s.d., where n=3).

**Abbreviations:** BH – Blank hydrogel; CGH – CG-AgNPs loaded hydrogel

**Table S4.** The connective tissue parameters represented as µg/ 40 mg of wound bed tissue were evaluated through hydroxyproline, hexosamine, and hexuronic acid content on the 7<sup>th</sup> and 14<sup>th</sup> day during the treatment with BH, CGH, and standard.

| Treatment group                 | Day 7          |              |              | Day 14        |               |                |
|---------------------------------|----------------|--------------|--------------|---------------|---------------|----------------|
|                                 | BH             | CGH          | Standard     | BH            | CGH           | Standard       |
| HPR (µg/ 40 mg of wound tissue) | 31.75 ± 3.96   | 67.61 ± 5.36 | 61.43 ± 4.81 | 68.24 ± 17.82 | 93.39 ± 1.89  | 119.45 ± 25.26 |
| HXA (µg/ 40 mg of wound tissue) | 166.33 ± 14.97 | 79.83 ± 7.09 | 82.33 ± 9.07 | 126.67 ± 2.89 | 46.67 ± 4.72  | 44.16 ± 3.61   |
| HUA (µg/ 40 mg of wound tissue) | 46.33 ± 7.37   | 83.66 ± 7.02 | 75.43 ± 9.16 | 79.65 ± 12.50 | 122.17 ± 5.09 | 77.36 ± 2.52   |

**Abbreviations:** BH – Blank hydrogel; CGH – CG-AgNPs loaded hydrogel; HPR – Hydroxyproline; HXA – Hexosamine; HUA – Hexuronic acid

**Table S5.** The pro-inflammatory (IL-6 and TNF-α) and anti-inflammatory (IL-10) cytokines are represented as pg/ml of the collected blood samples from each of the groups on the 7<sup>th</sup> and 14<sup>th</sup> day during the treatment with BH, CGH, and standard.

| Treatment group | Day 7        |              |              | Day 14       |              |              |
|-----------------|--------------|--------------|--------------|--------------|--------------|--------------|
|                 | BH           | CGH          | Standard     | BH           | CGH          | Standard     |
| IL-6 (pg/ml)    | 11.86 ± 3.18 | 5.79 ± 2.84  | 9.49 ± 1.32  | 7.32 ± 2.32  | 1.04 ± 0.37  | 2.26 ± 0.85  |
| TNF-α (pg/ml)   | 76.35 ± 6.41 | 31.01 ± 4.98 | 42.35 ± 5.41 | 74.05 ± 6.34 | 12.61 ± 2.87 | 21.65 ± 3.71 |
| IL-10 (pg/ml)   | 8.10 ± 2.77  | 26.13 ± 5.51 | 20.16 ± 2.49 | 9.17 ± 3.00  | 43.20 ± 4.22 | 36.47 ± 3.91 |

**Abbreviations:** BH – Blank hydrogel; CGH – CG-AgNPs loaded hydrogel; IL-6 – Interleukin-6; IL-10 – Interleukin 10; TNF-α – Tumor Necrosis Factor alpha
